# Supplementary material for: A new way to detect the interaction of DNA and anticancer drugs based on the decreased resonance light scattering signal and its potential application
Source: Royal Society of Chemistry journal article supplement (doi:10.1039/c1an15507e), 2011-01-01
Supplement: c1an15507e.pdf [file c1an15507e.pdf]

## Supporting Information

For

# A new way to detect the interaction of DNA and anticancer drugs based on the decreased resonance light scattering signal and its potential application

ZhanguangChen,<sup>\*a</sup> Tianhe Song,<sup>a</sup> Yurui Peng,<sup>a</sup> Xi Chen,<sup>b</sup> Junhui Chen,<sup>c</sup> Guomin Zhang,<sup>a</sup> Sihua Qian<sup>a</sup>

<sup>a</sup> Department of Chemistry, Shantou University, Shantou 515063, China

<sup>b</sup> Guangdong Pharmaceutical University, Guangzhou 510006, China

<sup>c</sup> Department of Oncology, the First Affiliated Hospital of Shantou University Medical College, Shantou 515041, China

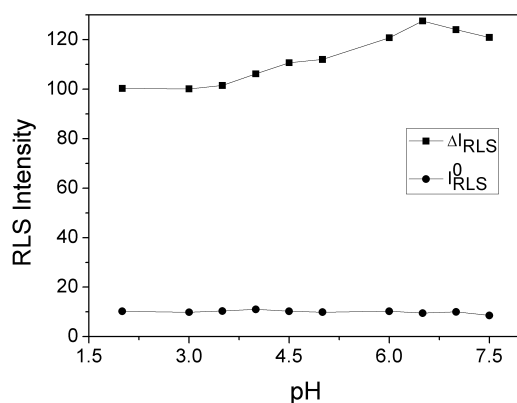

**Fig. S1.** Effect of the pH on the RLS intensity of the assay system. Conditions: DNA,  $2.0 \mu\text{g mL}^{-1}$ ; MB,  $5.0 \times 10^{-5} \text{ mol L}^{-1}$ .

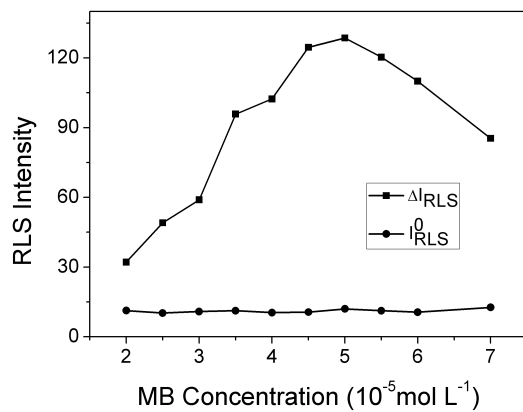

**Fig. S2.** Effect of the MB concentration on the RLS intensity of the assay system.

Conditions: DNA,  $2.0 \mu\text{g mL}^{-1}$ ; pH = 6.5.
